# Supplementary material for: HDAC1,2 Knock-Out and HDACi Induced Cell Apoptosis in Imatinib-Resistant K562 Cells
Source: PubMed Central journal article supplement (PMC6539538; doi:10.3390/ijms20092271), 2019-05-08
Supplement: ijms-20-02271-s001.pdf [file ijms-20-02271-s001.pdf]

**Supplementary table 1****Primary Antibody**

| Antibody    | Catalog Number | Company Name (Origin)                          |
|-------------|----------------|------------------------------------------------|
| GAPDH       | sc-32233       | Santa Cruz Biotechnology (Santa Cruz, CA, USA) |
| H3          | GTX122148      | GeneTex Inc. (Irvine, CA, USA)                 |
| H3K56AC     | GTX60902       | GeneTex Inc. (Irvine, CA, USA)                 |
| H3K18AC     | GTX128943      | GeneTex Inc. (Irvine, CA, USA)                 |
| H3K9AC      | GTX630554      | GeneTex Inc. (Irvine, CA, USA)                 |
| H4          | GTX129560      | GeneTex Inc. (Irvine, CA, USA)                 |
| H4K8AC      | GTX633420      | GeneTex Inc. (Irvine, CA, USA)                 |
| H4K16AC     | GTX632067      | GeneTex Inc. (Irvine, CA, USA)                 |
| p21         | GTX629543      | GeneTex Inc. (Irvine, CA, USA)                 |
| p27         | GTX100446      | GeneTex Inc. (Irvine, CA, USA)                 |
| C-PARP      | #9541          | Cell Signaling Technology (Danvers, MA, USA)   |
| C-CASPASE-3 | #9664          | Cell Signaling Technology (Danvers, MA, USA)   |
| p-AKT       | #4060          | Cell Signaling Technology (Danvers, MA, USA)   |
| p-ERK       | sc-7383        | Santa Cruz Biotechnology (Santa Cruz, CA, USA) |
| HDAC1       | GTX100513      | GeneTex Inc. (Irvine, CA, USA)                 |
| HDAC2       | GTX10964       | GeneTex Inc. (Irvine, CA, USA)                 |

**Secondary Antibody**

|                          |         |                                                 |
|--------------------------|---------|-------------------------------------------------|
| goat Anti-Rabbit IgG-HRP | sc-2004 | Santa Cruz Biotechnology ( Santa Cruz, CA, USA) |
| goat Anti-Mouse IgG-HRP  | sc-2005 | Santa Cruz Biotechnology ( Santa Cruz, CA, USA) |

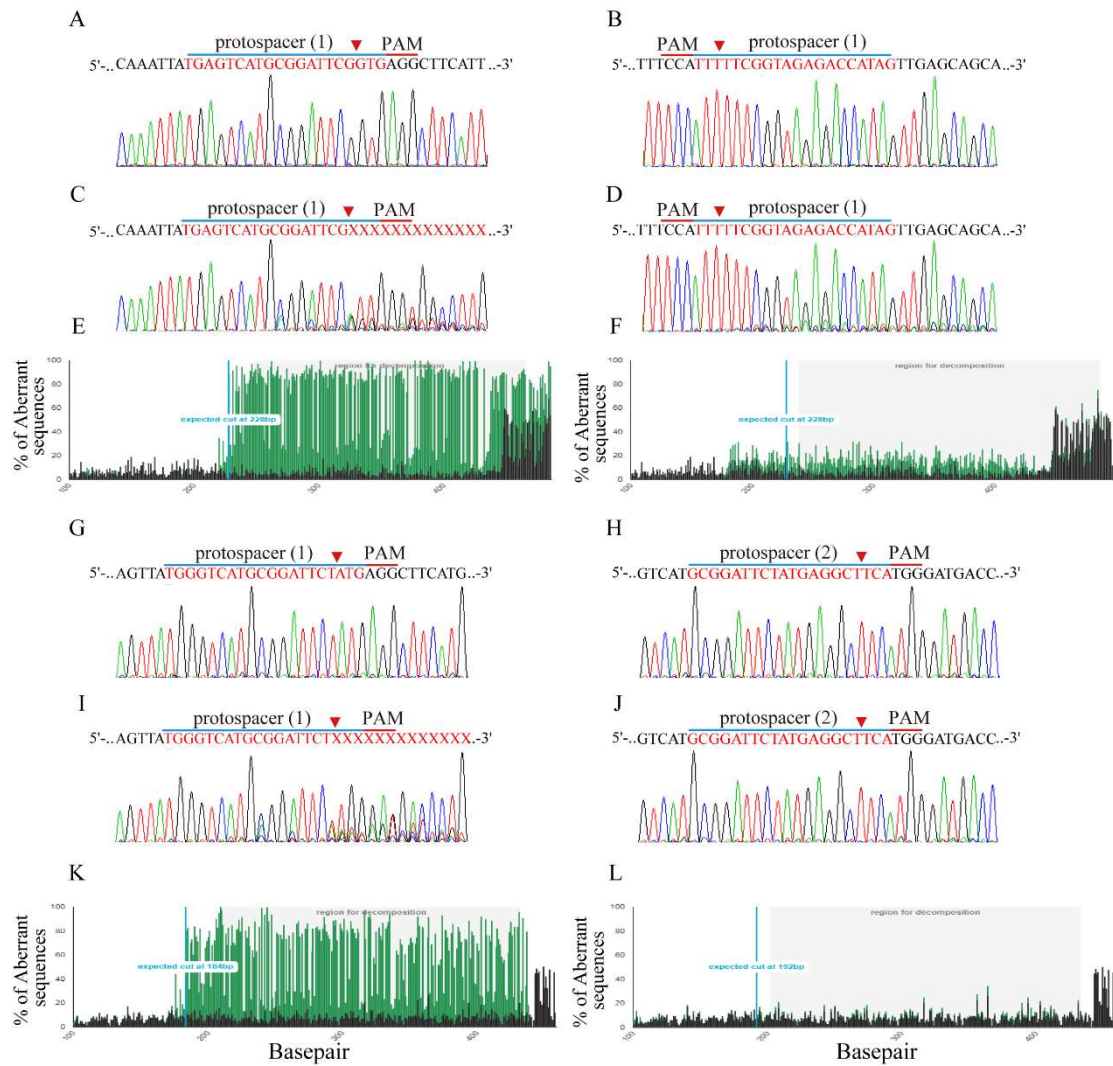

### Supplementary figure 1:

*HDAC1* genome sequence of (A) protospacer 1 (*HDAC1-1*) and (B) protospacer 2 (*HDAC1-2*) sgRNA gene loci in virus transfected K562 cells. (C) *HDAC1-1* and (D) *HDAC1-2* sgRNAs produced a mixture of sequences around the expected Cas9 cleavage point in a pool of gene-edited cells after lentivirus transduction. The original TIDE algorithm analysis is shown for (E) *HDAC1-1* and (F) *HDAC1-2* virus transfected on K562 cells, compares to SC K562 cells. *HDAC2* genome sequence of (G) protospacer 1 (*HDAC2-1*) and (H) protospacer 2 (*HDAC2-2*) gene loci in virus transfected K562 cells. (I) *HDAC2-1* and (J) *HDAC2-2* sgRNAs produced a mixture of sequences around the expected Cas9 cleavage point in a pool of gene-edited cells after lentivirus transduction. The original TIDE algorithm analysis is shown for (K) *HDAC2-1* and (L) *HDAC2-2* virus transfected on K562 cells, compares to SC K562 cells. The panels illustrate the aberrant sequence signal in the scrambled (green vs black).
